# Supplementary material for: Involvement of the liver-gut peripheral neural axis in nonalcoholic fatty liver disease pathologies via hepatic HTR2A
Source: Oxford University Press journal article supplement (doi:10.1242/dmm.049612), 2022-06-29
Supplement: dmm049612supp.pdf [file dmm049612supp.pdf]

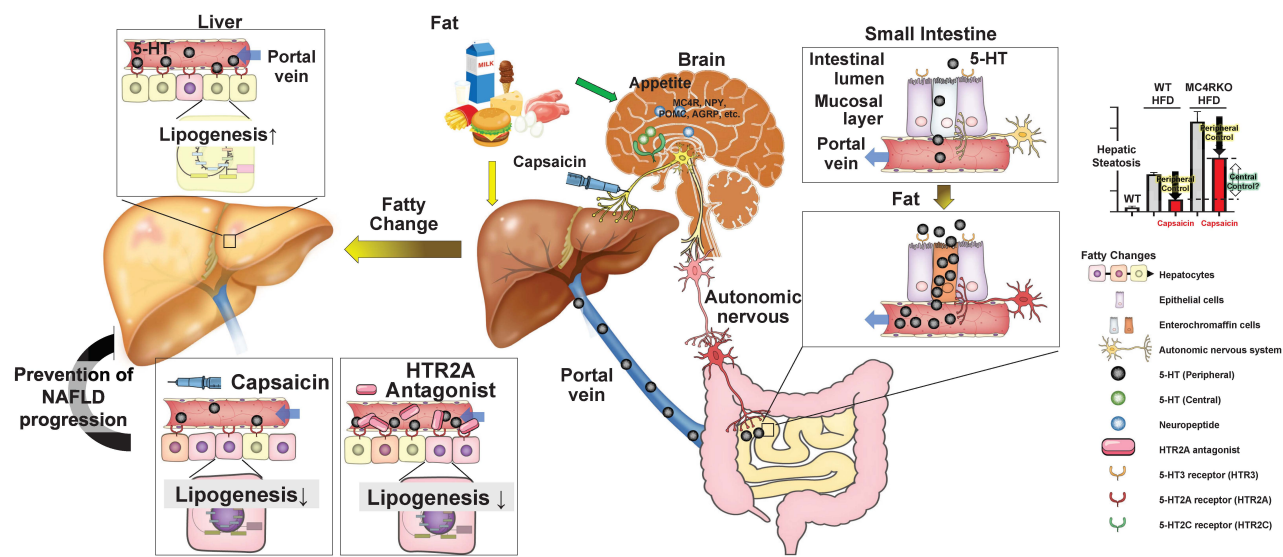

Fig. S1. Graphical abstract.

Table S1. Animal models

|                      | Mice        | Diet | Blockade of afferent sympathetic fibers | Follow up period |
|----------------------|-------------|------|-----------------------------------------|------------------|
| WT+SCD4W (Control)   | C57BL/6JJcl | SCD  | No                                      | 4 weeks          |
| WT+SCD8W (Control)   | C57BL/6JJcl | SCD  | No                                      | 8 weeks          |
| Sham+CDAA (4W)       | C57BL/6JJcl | CDAA | No                                      | 4 weeks          |
| Cap+CDAA (4W)        | C57BL/6JJcl | CDAA | Yes                                     | 4 weeks          |
| Sham+CDAA (8W)       | C57BL/6JJcl | CDAA | No                                      | 8 weeks          |
| Cap+CDAA (8W)        | C57BL/6JJcl | CDAA | Yes                                     | 8 weeks          |
| Sham+HFD (4W)        | C57BL/6JJcl | HFD  | No                                      | 4 weeks          |
| Cap+HFD (4W)         | C57BL/6JJcl | HFD  | Yes                                     | 4 weeks          |
| Sham+HFD (8W)        | C57BL/6JJcl | HFD  | No                                      | 8 weeks          |
| Cap+HFD (8W)         | C57BL/6JJcl | HFD  | Yes                                     | 8 weeks          |
| Sham+MC4RKO+SCD (4W) | MC4RKO      | SCD  | No                                      | 4 weeks          |
| Cap+MC4RKO+SCD (4W)  | MC4RKO      | SCD  | Yes                                     | 4 weeks          |
| Sham+MC4RKO+SCD (8W) | MC4RKO      | SCD  | No                                      | 8 weeks          |
| Cap+MC4RKO+SCD (8W)  | MC4RKO      | SCD  | Yes                                     | 8 weeks          |
| Sham+MC4RKO+HFD (4W) | MC4RKO      | HFD  | No                                      | 4 weeks          |
| Cap+MC4RKO+HFD (4W)  | MC4RKO      | HFD  | Yes                                     | 4 weeks          |
| Sham+MC4RKO+HFD (8W) | MC4RKO      | HFD  | No                                      | 8 weeks          |
| Cap+MC4RKO+HFD (8W)  | MC4RKO      | HFD  | Yes                                     | 8 weeks          |
| Sham+PH              | C57BL/6JJcl | SCD  | No                                      | 2 days           |
| Cap+PH               | C57BL/6JJcl | SCD  | Yes                                     | 2 days           |

**Table S2. The sequences of primers**

| <b>Gene name</b> | <b>Forward primer (5' -3' )</b> | <b>Reverse primer (5' -3' )</b> |
|------------------|---------------------------------|---------------------------------|
| <i>Tph1</i>      | ACCATGATTGAAGACAACAAGGAG        | TCAACTGTTCTCGGCTGATG            |
| <i>Htr2a</i>     | AAAGTTCTCTGCTGCGCTTC            | CACGCAATGTTAATGCCATC            |
| <i>Htr2b</i>     | AAATAAGCCACCTCAACGCCT           | TCCCGAAATGTCTTATTGAAGAG         |
| <i>Acaca</i>     | GCCTCTCCTGACAAACGAG             | TGACTGCCGAAACATCTCTG            |
| <i>Fasn</i>      | AAGCGGTCTGGAAAGCTGAA            | AGGCTGGGTTGATACCTCCA            |
| <i>Gpat1</i>     | CCACAGAGCTGGGAAAGGTT            | GTGCCTTGTGTGCGTTTCAT            |
| <i>Cpt1a</i>     | AGCTCGCACATTACAAGGACA           | CCAGCACAAAGTTGCAGGAC            |
| <i>Mtp</i>       | TCTCACAGTACCCGTTCTT             | TCTTCTCCGAGAGACATATCC           |
| <i>Pparg</i>     | GGTGTGATCTTAACTGCCGGA           | GCCCAAACCTGATGGCATTG            |
| <i>Srebp1c</i>   | GGAGCCATGGATTGCACATT            | GGCCCGGGAAGTCACTGT              |
| <i>Adgre1</i>    | TCAAGGACACGAGGTTGCTGA           | CCAAGGGGCAATCTGGAA              |
| <i>Ccl2</i>      | GGCTCAGCCAGATGCAGTTAA           | AGCCTACTCATTGGGATCATCTT         |
| <i>Colla1</i>    | ACATGTTTCAGCTTTGTGGACC          | TAGGCCATTGTGTATGCAGC            |
| <i>Tgfb1</i>     | GGGCTACCATGCCAACTTCTG           | GAGGGCAAGGACCTTGCTGTA           |
| <i>Timp1</i>     | CCCTGCTCAGCAAAGAGC              | TCACTCTCCAGTTTGCAAGG            |

**Table S3. Clinical characteristics of the patients**

| Clinical characteristics       | Control (n=54)<br>Median (min–max) | NAFLD (n=31)<br>Median (min–max) | <i>P</i> |
|--------------------------------|------------------------------------|----------------------------------|----------|
| Age                            | 61 (30–75)                         | 60 (18–76)                       | .7418    |
| Male:Female                    | 27:27                              | 16:15                            |          |
| Height (m)                     | 1.61 (1.41–1.90)                   | 1.62 (1.41–1.84)                 | .7046    |
| BW (kg)                        | 56.0 (34.2–111.0)                  | 69.8 (48.2–140.0)                | < .0001  |
| BMI (kg/m <sup>2</sup> )       | 22.1 (16.8–30.7)                   | 25.6 (21.1–47.9)                 | < .0001  |
| AST (U/L)                      | 22 (14–57)                         | 57 (26–166)                      | < .0001  |
| ALT (U/L)                      | 19 (8–62)                          | 70 (16–267)                      | < .0001  |
| ALP (U/L)                      | 211 (109–337)                      | 278 (107–510)                    | < .01    |
| γ-GTP (U/L)                    | 22 (7–159)                         | 78 (19–729)                      | < .0001  |
| T-Bil (mg/dL)                  | 0.7 (0.4–2.2)                      | 0.8 (0.4–2.9)                    | .0849    |
| HbA1c (%)                      | 5.6 (4.9–7.6)                      | 6.1 (4.4–9.1)                    | < .0001  |
| TG (mg/dL)                     | 105 (29–456)                       | 132 (31–464)                     | .0296    |
| TC (mg/dL)                     | 201 (146–280)                      | 196 (124–282)                    | .1146    |
| HDL-C (mg/dL)                  | 63 (37–121)                        | 50 (27–108)                      | .0100    |
| LDL-C (mg/dL)                  | 111 (63–256)                       | 116 (33–177)                     | .8253    |
| Plt (×10 <sup>4</sup> /μL)     | 23.4 (9.0–37.4)                    | 17.7 (7.8–36.5)                  | .0066    |
| FIB-4 Index                    | 1.37 (0.45–3.82)                   | 2.26 (0.36–10.47)                | .0002    |
| 5-HT (ng/mL)                   | 97.3 (27.1–281.4)                  | 64.0 (9.2–254.5)                 | .0026    |
| Liver CT score                 | 62.61 (49.88–71.54)                | 40.42 (10.89–63.12)              | < .0001  |
| Spleen CT score                | 47.86 (38.51–59.76)                | 50.44 (28.84–57.40)              | .7335    |
| Liver-to-spleen CT score ratio | 1.27 (1.05–1.59)                   | 0.88 (0.22–1.35)                 | < .0001  |

BW, body weight; BMI, body mass index; AST, alanine aminotransferase; ALT, aspartate transaminase; ALP, alkaline phosphatase; γ-GTP, γ-glutamyl transferase; T-Bil, total bilirubin; HbA1c, hemoglobin A1c; TG, triglyceride; TC, total cholesterol; HDL-C, high-density lipoprotein cholesterol; LDL-C, low-density lipoprotein cholesterol; Plt, platelet; FIB-4, Fibrosis-4; 5-HT, 5-hydroxytryptamin. The values represent median (minimum–maximum), Mann–Whitney U test.

**Table S4. Effect of autonomic neural signal transduction and HTR2A antagonist administration on the serum biochemical factors in mice**

|                   | Control      | Sham+CDAA 4 W | Cap+CDAA 4 W    | Sham+HFD 4 W  | Cap+HFD 4 W   | MC4RKO+<br>Sham+SCD 4<br>W | MC4RKO+<br>Cap+SCD 4 W | MC4RKO+<br>Sham+HFD 4 W | MC4RKO+<br>Cap+HFD 4 W | HFD 4 W,<br>Sar (-) | HFD 4 W,<br>Sar (+) |
|-------------------|--------------|---------------|-----------------|---------------|---------------|----------------------------|------------------------|-------------------------|------------------------|---------------------|---------------------|
| <b>AST (U/L)</b>  | 142.3 (41.6) | 340.2 (109.9) | 418.5 (17.4)    | 423.0 (85.9)  | 286.2 (99.4)  | 152.5 (39.9)               | 106.0 (11.0)           | 164.8 (41.3)            | 100.0 (19.7)           | 205.0 (16.7)        | 158.0 (7.6)         |
| <b>ALT (U/L)</b>  | 32.3 (8.5)   | 99.0 (9.0)    | 189.0 (30.4) ** | 162.0 (25.6)  | 108.0 (22.0)  | 31.3 (3.4)                 | 21.5 (1.7)             | 92.4 (17.4)             | 43.5 (11.1)            | 33.5 (4.9)          | 26.3 (1.7)          |
| <b>ALP (U/L)</b>  | 131.9 (40.2) | 400.5 (40.9)  | 607.5 (80.9)    | 477.0 (196.2) | 400.5 (59.7)  | 243.3 (15.6)               | 217.6 (10.5)           | 144.9 (22.6)            | 118.2 (15.1)           | 218.0 (8.2)         | 192.0 (9.9)         |
| <b>TC (mg/dL)</b> | 60.9 (6.2)   | 67.5 (6.0)    | 76.5 (8.3)      | 139.5 (12.9)  | 85.5 (16.2) * | 74.3 (4.9)                 | 76.7 (1.4)             | 162.7 (5.6)             | 133.8 (5.8) *          | 138.5 (7.9)         | 146.0 (2.1)         |
| <b>TG (mg/dL)</b> | 50.1 (4.8)   | 58.5 (4.5)    | 72.0 (5.7)      | 103.5 (4.5)   | 63.0 (5.7) ** | 57.7 (7.8)                 | 46.0 (9.9)             | 84.5 (18.4)             | 91.8 (12.5)            | 73.7 (12.4)         | 50.0 (8.4)          |

|                   | Sham+CDAA 8 W | Cap+CDAA 8 W   | Sham+HFD 8 W  | Cap+HFD 8 W     | MC4RKO+<br>Sham+SCD 8 W | MC4RKO+<br>Cap+SCD 8 W | MC4RKO+<br>Sham+HFD 8 W | MC4RKO+<br>Cap+HFD 8 W | MC4RKO+<br>HFD 4 W, Sar (-) | MC4RKO+<br>HFD 4 W, Sar (+) |
|-------------------|---------------|----------------|---------------|-----------------|-------------------------|------------------------|-------------------------|------------------------|-----------------------------|-----------------------------|
| <b>AST (U/L)</b>  | 334.8 (48.0)  | 459.0 (81.7) * | 432.0 (100.5) | 351.0 (41.8)    | 142.2 (28.9)            | 163.4 (30.1)           | 169.3 (39.2)            | 169.3 (36.8)           | 164.8 (41.3)                | 174.4 (23.9)                |
| <b>ALT (U/L)</b>  | 166.5 (29.1)  | 175.5 (18.1)   | 139.5 (20.2)  | 193.5 (23.6)    | 29.3 (2.3)              | 43.3 (12.5)            | 141.5 (24.9)            | 59.3 (14.8) **         | 92.4 (17.4)                 | 97.2 (18.0)                 |
| <b>ALP (U/L)</b>  | 661.5 (53.4)  | 643.5 (50.9)   | 496.8 (58.3)  | 626.4 (84.3)    | 188.7 (11.4)            | 178.6 (10.1)           | 189.5 (33.6)            | 149.5 (26.7)           | 216.8 (17.2)                | 241.3 (10.6)                |
| <b>TC (mg/dL)</b> | 108.0 (6.9)   | 81.0 (9.9)     | 58.5 (8.3)    | 148.5 (6.0) *** | 73.5 (4.4)              | 76.0 (2.9)             | 180.1 (17.6)            | 155.3 (12.0)           | 153.0 (8.1)                 | 144.0 (4.0)                 |
| <b>TG (mg/dL)</b> | 58.5 (4.5)    | 67.5 (6.0)     | 117.0 (5.7)   | 90.0 (9.0)      | 47.3 (8.0)              | 76.4 (5.9) *           | 100.3 (10.1)            | 52.8 (7.4) ***         | 84.5 (18.4)                 | 68.0 (11.7)                 |

AST, alanine aminotransferase; ALT, aspartate transaminase; ALP, alkaline phosphatase; TC, total cholesterol; TG, triglyceride; Sar, sarpogrelate. The values represent mean (SD) (n = 6 for each group), Significance of the difference was evaluated using Welch's *t*-test. (\**P* < .05, \*\**P* < .01, \*\*\**P* < .001 vs Sham group).
